# Supplementary material
Source: Springer Nature journal article supplement (https://www.springerprofessional.de/resource/supplementary/13673_2012_32_MOESM1_ESM.pdf/11899398)

# Command Balance

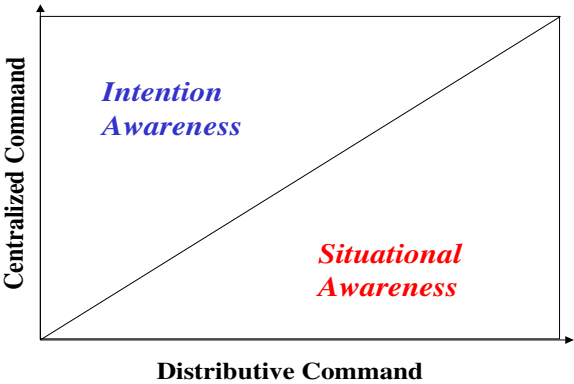

Supplement: MOESM1 [file 11899398]
